# Supplementary material for: Identification, mRNA Expression, and Functional Analysis of Chitin Synthase 1 Gene and Its Two Alternative Splicing Variants in Oriental Fruit Fly, Bactrocera dorsalis
Source: PubMed Central journal article supplement — Int J Biol Sci. 2013 Apr 5;9(4):331–42. doi: 10.7150/ijbs.6022 (PMC3619095; doi:10.7150/ijbs.6022), 2013-04-05
Supplement: ijbsv09p0331s1.pdf [file ijbsv09p0331s1.pdf]

## Supplementary Material

**Table S1. Primers used to amplify the full-length *BdCHS1* cDNA from *Bactrocera dorsalis*.**

| PCR fragment | Direction <sup>a</sup> | Type <sup>b</sup> | Nucleotide Sequence (5'–3')                       | Size (nt) |
|--------------|------------------------|-------------------|---------------------------------------------------|-----------|
| 1            | F                      | S                 | TCGTACGTCCGATGTATTCCGGC                           | 1694      |
|              | R                      | S                 | GACGACATTCAGATTGATGAT                             |           |
| 2            | F                      | S                 | GGTGGAACAGGCTAGAATTGCT                            | 383       |
|              | R                      | S                 | CTATCAAAGCGTCCTGTGAAG                             |           |
| 3            | F                      | 5'-RACE Adapter   | CTAATACGACTCACTATAGGGCAAGCAGT<br>GGTATCAACGCAGAGT | 1462      |
|              | R                      | S                 | GAAACCAGTTACTTGTGCCGC                             |           |
| 4            | F                      | S                 | CCAGCAACTCCGATACTCACG                             | 499       |
|              | R                      | 3'-RACE Adapter   | CTAATACGACTCACTATAGGGCAAGCAGT<br>GGTATCAACGCAGAGT |           |

<sup>a</sup> F: forward primer; R: reverse primer

<sup>b</sup> S: specific primer

**Table S2. Primers used for qPCR analysis and dsRNA synthesis of *BdCHS1* and its two alternative splicing variants.**

| Purpose          | Gene name      | Direction            | Nucleotide Sequence (5'–3')                | Size (nt) | Positions corresponding to the nucleotides in Fig. 2 |
|------------------|----------------|----------------------|--------------------------------------------|-----------|------------------------------------------------------|
| qPCR analysis    | <i>BdCHS1</i>  | F                    | ATCGGTGCCTTCATACGTTC                       | 218       | 448–665                                              |
|                  |                | R                    | CGTGACAAAAGCCCCAGTAT                       |           |                                                      |
|                  | <i>BdCHS1a</i> | F                    | AATTGCTAAAGATCTTAAAGAGTTGC                 | 169       | 3789–3957                                            |
|                  |                | R                    | TTGTGTGGATTTCGTCGTAGG                      |           |                                                      |
|                  | <i>BdCHS1b</i> | F                    | CATCGCAGCCGATCTCAT                         | 150       | 3789–3938                                            |
|                  |                | R                    | GTTATATTTGTCTTGACGCCAGT                    |           |                                                      |
| <i>α-Tubulin</i> | F              | CGCATTCATGGTTGATAACG | 184                                        | —         |                                                      |
|                  | R              | GGGCACCAAGTTAGTCTGGA |                                            |           |                                                      |
| dsRNA synthesis  | <i>BdCHS1</i>  | F                    | TAATACGACTCACTATAGGGATTCTTGATTGCTATGACGG   | 417       | 3039–3455                                            |
|                  |                | R                    | TAATACGACTCACTATAGGGATGGTGTTTAATGACTCGGC   |           |                                                      |
|                  | <i>BdCHS1a</i> | F                    | TAATACGACTCACTATAGGGGCTAGAATTGCTAAAGATCTT  | 177       | 3784–3960                                            |
|                  |                | R                    | TAATACGACTCACTATAGGGCTCTTGTGTGGATTTCGTCGTA |           |                                                      |
|                  | <i>BdCHS1b</i> | F                    | TAATACGACTCACTATAGGGGCACGCATCGCAGCCGATCTC  | 177       | 3784–3960                                            |
|                  |                | R                    | TAATACGACTCACTATAGGGCTCTGATGCTCTTCAATATA   |           |                                                      |
|                  | <i>GFP</i>     | F                    | TAATACGACTCACTATAGGG CAGTTCTTGTGAATTAGATG  | 436       | —                                                    |
|                  |                | R                    | TAATACGACTCACTATAGGG TTTGGTTTGTCTCCCATGATG |           |                                                      |

F: forward primer; R: reverse primer
